# Supplementary material
Source: MDPI journal article supplement (https://www.mdpi.com/2072-4292/11/1/92)
Supplement: s1 [file s1]

# Optimizing the remote detection of tropical rainforest structure with airborne Lidar: leaf area profile sensitivity to pulse density and spatial sampling

Almeida, D. R. A.; Stark, S. C.; Shao, G.; Schietti, J.; Nelson, B. W.; Silva, C. A.; Gorgens, E. B.; Valbuena, R; Papa, D. A.; Brancalion, P. H. S.

## SUPPLEMENTARY MATERIAL

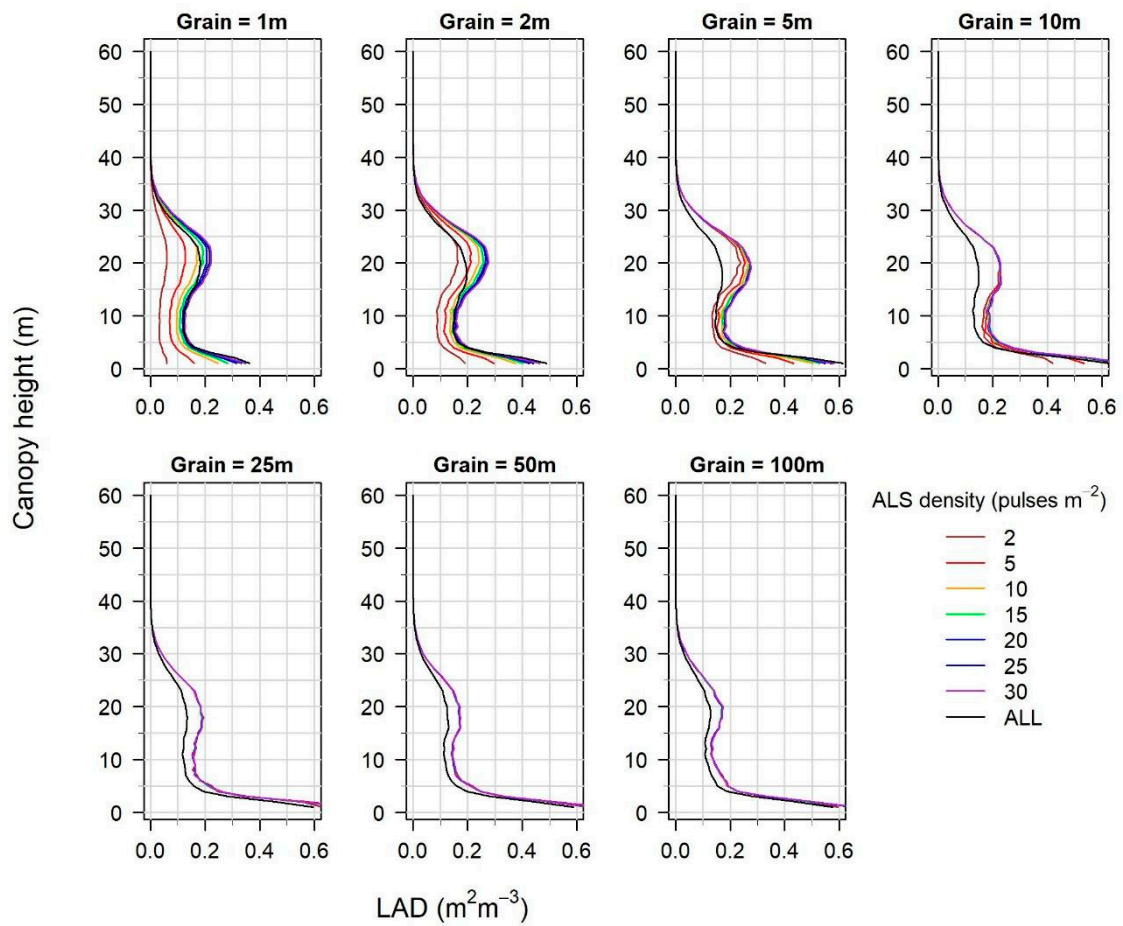

Figure S1 - Changes in the 24-hectare mean ALS profile of LAD (in absolute values;  $m^2 m^{-3}$ ) as a function of grain size (panels) and pulse density (profile colors). In this figure we added the profile using ALL returns (including multiple returns) totaling a density of 55 returns  $m^{-2}$ .

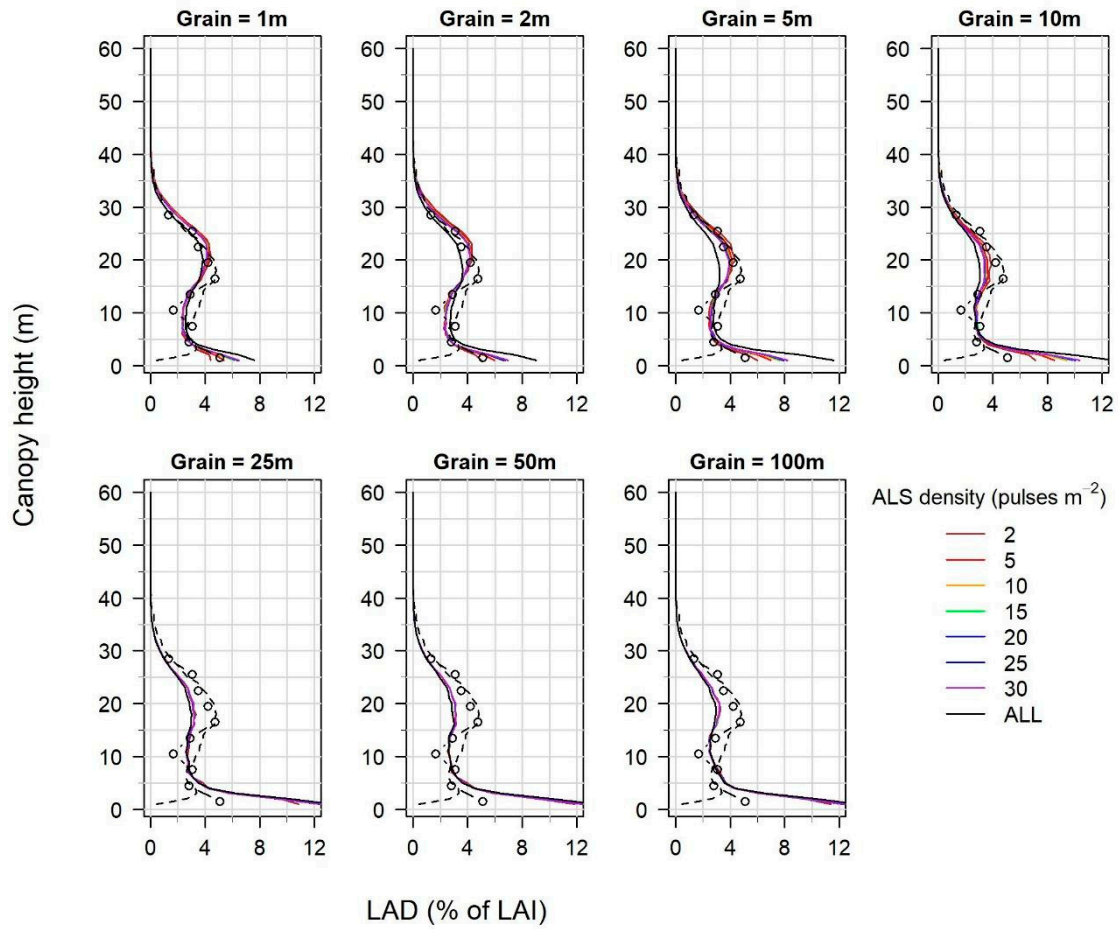

**Figure S2** - Behavior of the 24-plot mean LAD profile in relative values (% of LAI), as a function of grain size (panels). For ALS, different pulse densities are shown as different colored profile lines, but these overlap to a high degree. The black dashed line is the 24-plot mean relative LAD from the PCL at a fixed, high pulse density (2,000 pulses m<sup>-1</sup>) and at different grain sizes (panels). Open circles show the four-plot mean relative LAD profile of destructively measured field data with a fixed grain size of 100m<sup>2</sup> and no pulse density. In this figure we added the profile using ALL returns (including multiple returns) totalizing a density of 55 returns m<sup>-2</sup>.
